# Supplementary material
Source: PubMed Central journal article supplement (PMC9627555)
Supplement: deac210_supplementary_table_si.pdf [file deac210_supplementary_table_si.pdf]

**Supplementary Table S1 Association between history of polycystic ovary syndrome (PCOS) prior to delivery and adverse pregnancy outcomes among primiparous deliveries to women in study sample aged  $\geq 18$  between 1 October 2013 and 31 December 2017.**

|                                                        | No diagnosis of PCOS |       | Diagnosis of PCOS |       | Relative risk (95% CI) <sup>1</sup> |                               |
|--------------------------------------------------------|----------------------|-------|-------------------|-------|-------------------------------------|-------------------------------|
|                                                        | n                    | %     | n                 | %     | Crude                               | Adjusted <sup>2</sup>         |
| Total deliveries                                       | 42 811               | 100.0 | 1997              | 100.0 |                                     |                               |
| Maternal outcomes                                      |                      |       |                   |       |                                     |                               |
| Gestational diabetes                                   | 2992                 | 7.0   | 258               | 12.9  | 1.85 (1.65–2.09)                    | 1.43 (1.27–1.61)              |
| PIH/eclampsia/preeclampsia                             | 5479                 | 12.8  | 365               | 18.3  | 1.43 (1.30–1.57)                    | 1.11 (1.01–1.22)              |
| Caesarean section <sup>3</sup>                         | 13 636               | 31.9  | 713               | 35.7  | 1.12 (1.06–1.19)                    | 1.01 (0.95–1.07)              |
| Placental abnormalities                                | 1285                 | 3.0   | 54                | 2.7   | 0.90 (0.69–1.18)                    | 0.95 (0.72–1.24)              |
| Infant outcomes                                        |                      |       |                   |       |                                     |                               |
| Total infants                                          | 43 686               | 100.0 | 2075              | 100.0 |                                     |                               |
| Total live births                                      | 43 554               | 99.7  | 2066              | 99.6  |                                     |                               |
| Large for gestational age <sup>4</sup>                 | 2878                 | 6.8   | 150               | 7.5   | 1.11 (0.95–1.30)                    | 1.00 (0.86–1.18) <sup>8</sup> |
| Small for gestational age <sup>4</sup>                 | 4118                 | 9.7   | 201               | 10.0  | 1.02 (0.89–1.17)                    | 1.04 (0.91–1.20)              |
| Low birthweight (<2500 g)                              | 3337                 | 7.6   | 256               | 12.3  | 1.59 (1.39–1.81)                    | 1.23 (1.09–1.40)              |
| Low birthweight (<2500 g) full-term only               | 1006                 | 2.5   | 68                | 3.8   | 1.53 (1.19–1.96)                    | 1.38 (1.07–1.77)              |
| Preterm birth (<37 weeks)                              | 3618                 | 8.3   | 272               | 13.2  | 1.54 (1.36–1.75)                    | 1.21 (1.07–1.36)              |
| Neonatal prolonged hospital stay <sup>4,5,6</sup>      | 2208                 | 5.3   | 160               | 8.3   | 1.48 (1.26–1.75)                    | 1.20 (1.03–1.39)              |
| Neonatal conditions                                    |                      |       |                   |       |                                     |                               |
| Infectious disease conditions <sup>6,7</sup>           | 465                  | 1.4   | 40                | 2.6   | 1.86 (1.33–2.59)                    | 1.38 (0.98–1.95)              |
| Cardiovascular conditions <sup>6,7</sup>               | 763                  | 2.2   | 47                | 3.1   | 1.45 (1.08–1.95)                    | 1.11 (0.83–1.48)              |
| Respiratory conditions <sup>6,7</sup>                  | 5827                 | 17.0  | 336               | 22.3  | 1.28 (1.16–1.42)                    | 1.11 (1.00–1.22)              |
| Gastrointestinal/nutritional conditions <sup>6,7</sup> | 2599                 | 7.6   | 175               | 11.6  | 1.48 (1.27–1.73)                    | 1.12 (0.95–1.33)              |
| Neurologic conditions <sup>6,7</sup>                   | 1922                 | 5.6   | 108               | 7.2   | 1.28 (1.06–1.54)                    | 1.21 (1.00–1.46)              |
| Hematologic conditions <sup>6,7</sup>                  | 4997                 | 14.6  | 323               | 21.4  | 1.47 (1.33–1.63)                    | 1.08 (0.98–1.19)              |

<sup>1</sup>Crude and adjusted relative risk approximated using general estimating equations with a log link and Poisson distribution to take into account multiple deliveries by the same women.  
<sup>2</sup>Multivariate models adjusted for maternal age (continuous), BMI (<25.0, 25.0+, unknown), race (non-Hispanic White, other race/ethnicity, unknown), education (high school + some college, completed college, unknown), plurality (singleton, multiples), birth year (2013–2017 ordinal categorical variable) and history of hypertension or diabetes.  
<sup>3</sup>Excluding those with unknown mode of delivery.  
<sup>4</sup>Limited to live births only.  
<sup>5</sup>Limited analysis to those whose gestational age  $\geq 35$  weeks, with known data on mode of delivery and birth hospital records. Prolonged stay defined as >3 days for vaginal delivery or >5 days for C-section.  
<sup>6</sup>Relative risk additionally adjusted for gestational age (continuous variable, range 17–44), excluding those with unknown GA.  
<sup>7</sup>Limited to live births 1 October 2013–31 December 2016 (to allow 1-year follow-up).  
<sup>8</sup>Excluded those with unknown race to converge the adjusted model.  
 PIH, pregnancy-induced hypertension.
