# Supplementary material
Source: PubMed Central journal article supplement (PMC9627555)
Supplement: deac210_supplementary_table_sii.pdf [file deac210_supplementary_table_sii.pdf]

human reproduction **SUPPLEMENTARY DATA**

**Supplementary Table SII Association between history of polycystic ovary syndrome (PCOS) and adverse pregnancy outcomes among deliveries in study sample women aged ≥18 between 1 October 2013 and 31 December 2017, stratified by BMI.\***

|                                                       | No diagnosis of PCOS |      | Diagnosis of PCOS |      | aRR (95% CI) <sup>1</sup> | P-value, test for homogeneity <sup>2</sup> |
|-------------------------------------------------------|----------------------|------|-------------------|------|---------------------------|--------------------------------------------|
|                                                       | n                    | %    | n                 | %    |                           |                                            |
| <b>Gestational diabetes</b>                           |                      |      |                   |      |                           |                                            |
| BMI < 25                                              | 2888                 | 5.3  | 126               | 7.7  | 1.46 (1.23–1.73)          | 0.94                                       |
| BMI ≥ 25                                              | 3571                 | 11.4 | 346               | 19.1 | 1.57 (1.41–1.74)          |                                            |
| <b>PIH/eclampsia/preeclampsia</b>                     |                      |      |                   |      |                           |                                            |
| BMI < 25                                              | 3892                 | 7.2  | 136               | 8.3  | 1.04 (0.88–1.24)          | 0.047                                      |
| BMI ≥ 25                                              | 4883                 | 15.6 | 420               | 23.2 | 1.35 (1.23–1.48)          |                                            |
| <b>Cesarean section<sup>3</sup></b>                   |                      |      |                   |      |                           |                                            |
| BMI < 25                                              | 14844                | 27.4 | 450               | 27.5 | 1.02 (0.94–1.10)          | 0.34                                       |
| BMI ≥ 25                                              | 12353                | 39.4 | 777               | 42.9 | 1.08 (1.02–1.13)          |                                            |
| <b>Small for gestational age<sup>4</sup></b>          |                      |      |                   |      |                           |                                            |
| BMI < 25                                              | 4331                 | 8.0  | 154               | 9.3  | 1.10 (0.94–1.29)          | 0.77                                       |
| BMI ≥ 25                                              | 1868                 | 5.9  | 131               | 7.1  | 1.13 (0.94–1.34)          |                                            |
| <b>Large for gestational age<sup>4</sup></b>          |                      |      |                   |      |                           |                                            |
| BMI < 25                                              | 3990                 | 7.3  | 100               | 6.1  | 0.85 (0.70–1.04)          | 0.24                                       |
| BMI ≥ 25                                              | 3976                 | 12.6 | 227               | 12.3 | 0.98 (0.86–1.11)          |                                            |
| <b>Low birthweight (&lt;2500 g)</b>                   |                      |      |                   |      |                           |                                            |
| BMI < 25                                              | 3516                 | 6.4  | 169               | 9.9  | 1.17 (1.01–1.36)          | 0.89                                       |
| BMI ≥ 25                                              | 2025                 | 6.3  | 198               | 10.5 | 1.25 (1.07–1.45)          |                                            |
| <b>Preterm birth (&lt;37 weeks)</b>                   |                      |      |                   |      |                           |                                            |
| BMI < 25                                              | 3991                 | 7.2  | 187               | 11.0 | 1.19 (1.03–1.39)          | 0.47                                       |
| BMI ≥ 25                                              | 2656                 | 8.3  | 235               | 12.6 | 1.17 (1.02–1.35)          |                                            |
| <b>Neonatal prolonged hospital stay<sup>4,5</sup></b> |                      |      |                   |      |                           |                                            |
| BMI < 25                                              | 2256                 | 4.2  | 92                | 5.7  | 1.07 (0.88–1.30)          | 0.26                                       |
| BMI ≥ 25                                              | 1392                 | 4.5  | 132               | 7.5  | 1.30 (1.10–1.54)          |                                            |

\*Analyses are limited to those with known BMI.  
<sup>1</sup>Crude and adjusted relative risk approximated using general estimating equations with a log link and Poisson distribution to take into account multiple deliveries by the same women; multivariate models adjusted for maternal age (continuous), race (non-Hispanic White, other race/ethnicity, unknown), education (high school + some college, completed college, unknown), plurality (singleton, multiples), birth year (2013–2017 ordinal categorical variable) and history of hypertension or diabetes.  
<sup>2</sup>Based on generalized estimating equations type 3 estimates.  
<sup>3</sup>Excluding those with unknown mode of delivery.  
<sup>4</sup>Limited to live births only.  
<sup>5</sup>Limited analysis to those whose gestational age ≥35 weeks, with known data on mode of delivery and birth hospital records.  
 aRR, adjusted relative risk; PIH, pregnancy-induced hypertension.
